# Supplementary material for: Structures and thermodynamics of water encapsulated by graphene
Source: PubMed Central journal article supplement (PMC5453971; doi:10.1038/s41598-017-02582-7), 2017-06-01
Supplement: 41598_2017_2582_MOESM1_ESM.pdf [file 41598_2017_2582_MOESM1_ESM.pdf]

# **Supplementary Information for Structures and Thermodynamics of Water Encapsulated by Graphene**

Shuping Jiao<sup>1</sup>, Chuanhua Duan<sup>2</sup> and Zhiping Xu<sup>1,\*</sup>

<sup>1</sup>Applied Mechanics Laboratory, Department of Engineering Mechanics, and Center for Nano and Micro Mechanics, Tsinghua University, Beijing 100084, China

<sup>2</sup>Department of Mechanical Engineering, Boston University, Boston, MA 02215, USA

\*Email: [xuzp@tsinghua.edu.cn](mailto:xuzp@tsinghua.edu.cn)

This Supplementary Information Material contains

- Supplementary Figures S1-S6, Table S1 and Captions

## Supplementary Figures, Table and Captions

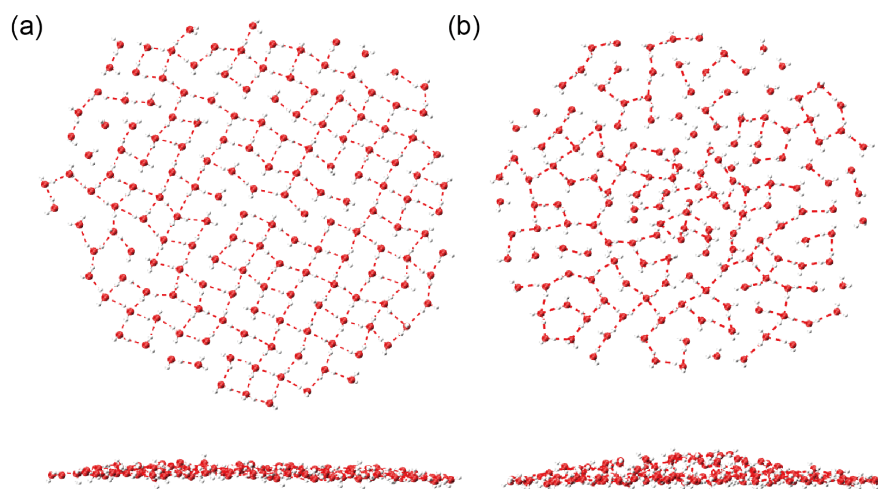

**FIG. S1.** Snapshots (top and side views) of simulated encapsulated water (EW) with  $N_w = 165$  at (a)  $T = 400$  K and (b)  $T = 450$  K, in the 3D cover model.

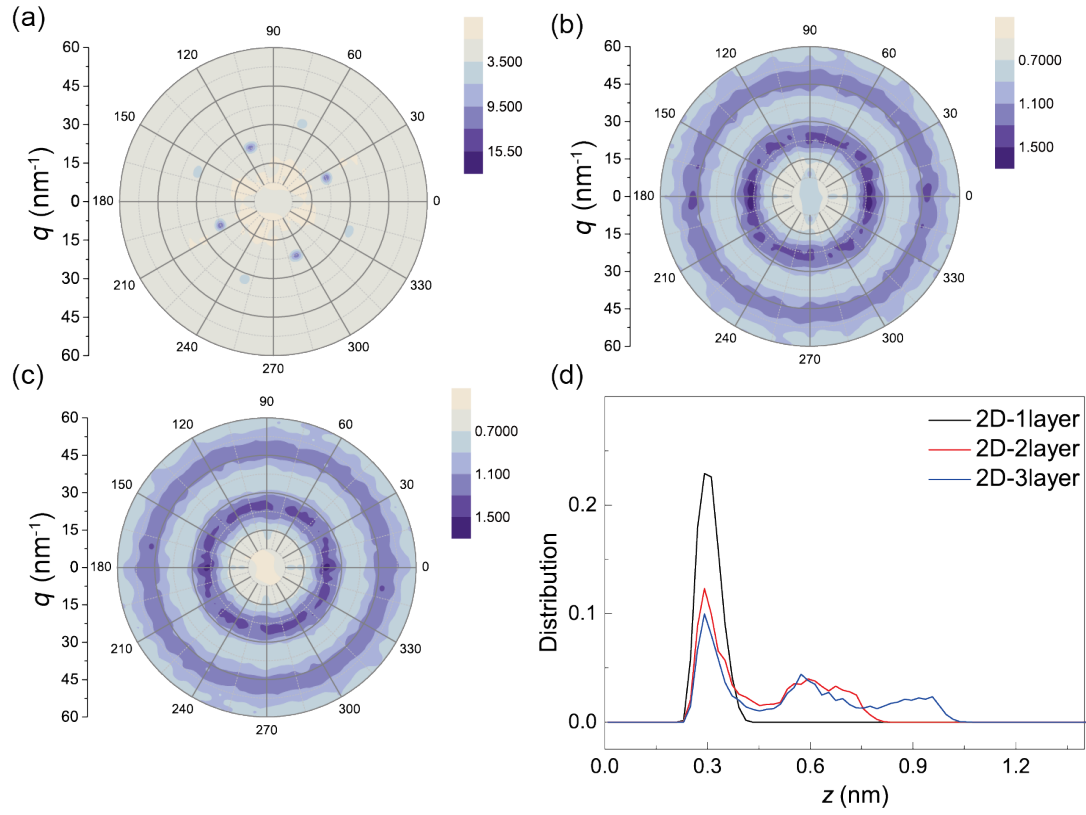

**FIG. S2.** (a-c) Structure factors of mono-, bi- and tri-layer EW, with the number of water molecules  $N_W = 60, 181, 354$  at  $T = 300$  K. (d) The  $z$ -direction density profile of 2D (half-cylindrical) EWs with mono-, bi- and tri-layer structures, at  $T = 300$  K.

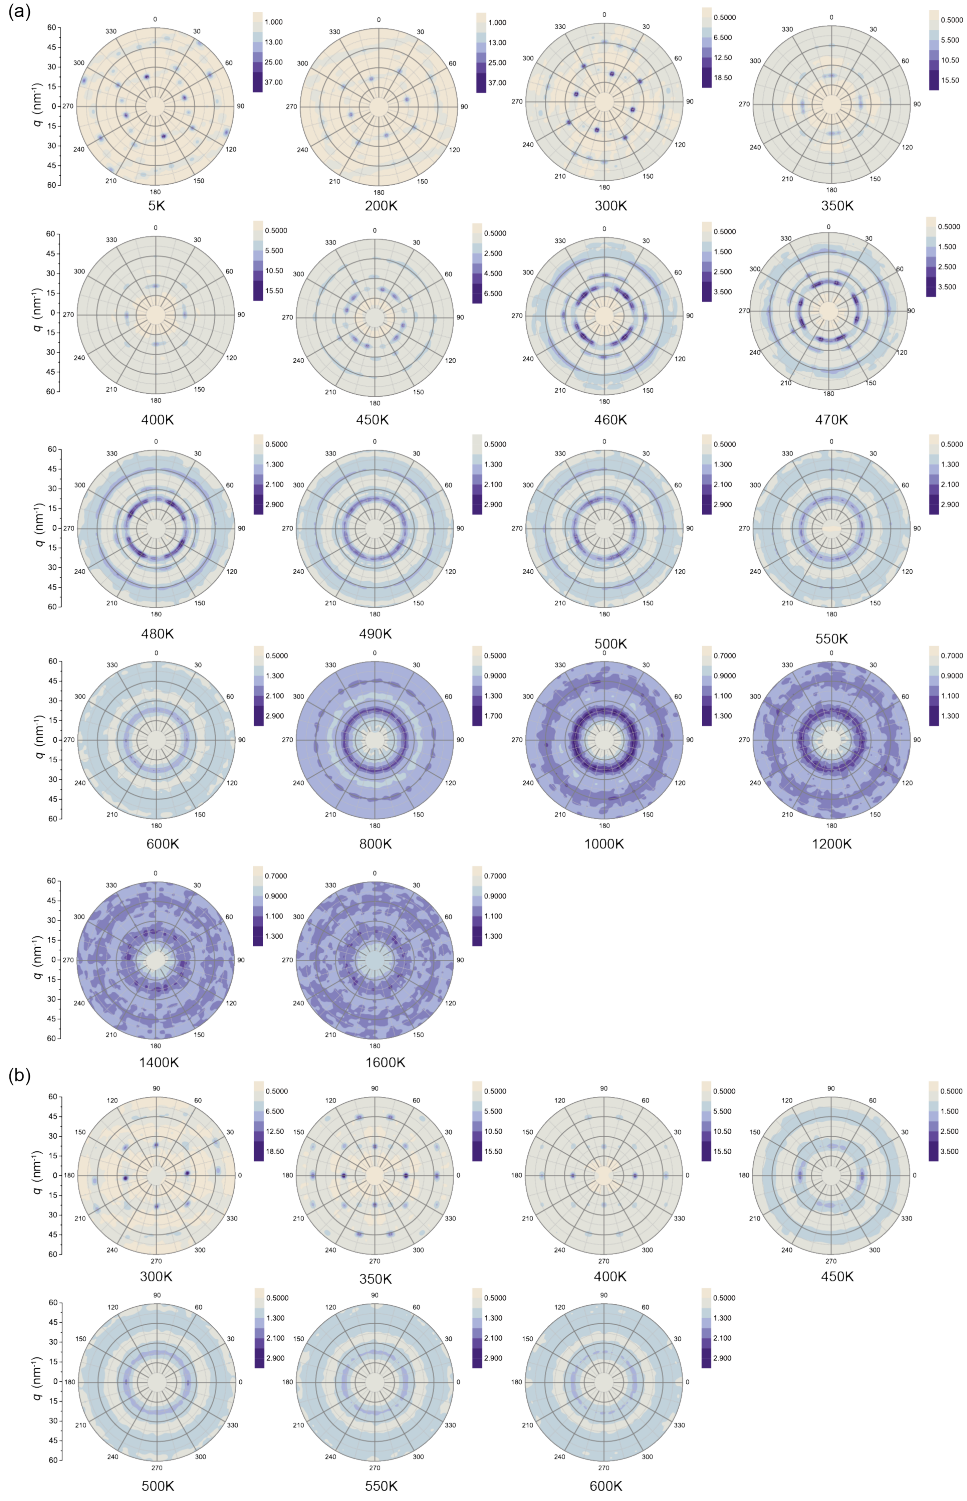

**FIG. S3.** Structure factors of monolayer EW ( $N_W = 115$ ) at different temperature in the 3D (hemispheric) (a) and 2D (b) structure.

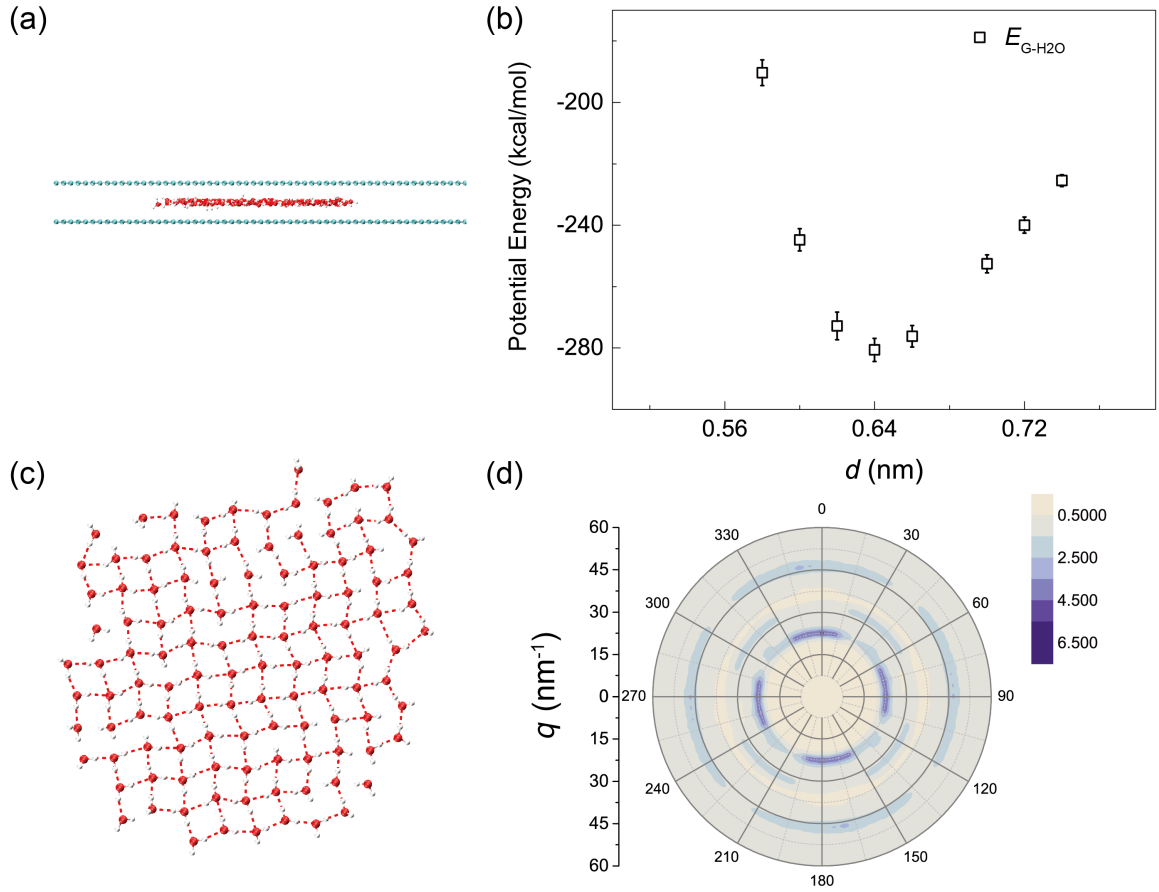

**FIG. S4.** (a) The atomistic model with intercalated water ( $N_W = 115$ ) between two flat graphene sheets with an interlayer distance  $d$ , at 300 K. (b) The potential energy of intercalated water as a function of  $d$ , with a minimum at  $d = 0.64$  nm. (c, d) The atomic structures and structure factor of the intercalated water structures at  $d = 0.64$  nm, and  $T = 300$  K.

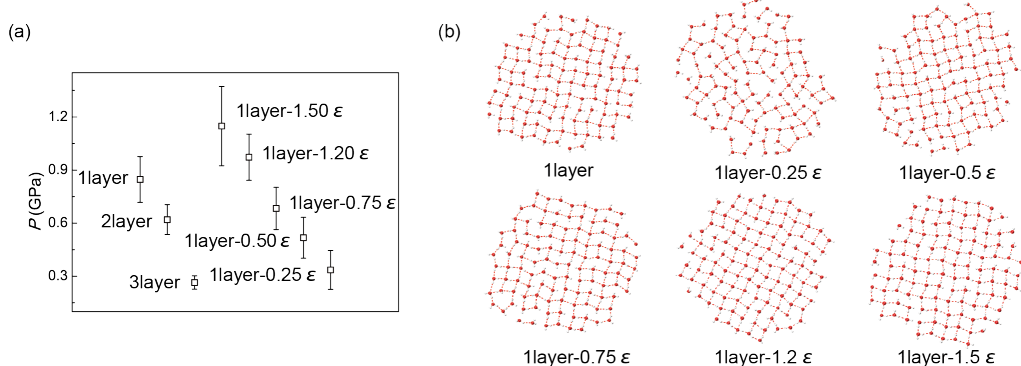

**FIG. S5.** (a) The pressure in mono-, bi- and tri-layer EW structures ( $N_W = 115$ ,  $T = 300$  K) under 3D graphene cover, calculated using the Lennard-Jones potential parameter  $\epsilon$  and several modified values ( $0.25\epsilon$ ,  $0.5\epsilon$ ,  $0.75\epsilon$ ,  $1.2\epsilon$ ,  $1.5\epsilon$ ). The reference value  $\epsilon$  is parametrized by fitting the water contact angle (WCA) of graphene to  $98^\circ$ . The WCAs for  $1.2\epsilon$  is  $75^\circ$ . (b) Atomic structures of monolayer EWs predicted by these modified values of  $\epsilon$  ( $N_W = 115$ ,  $T = 300$  K).

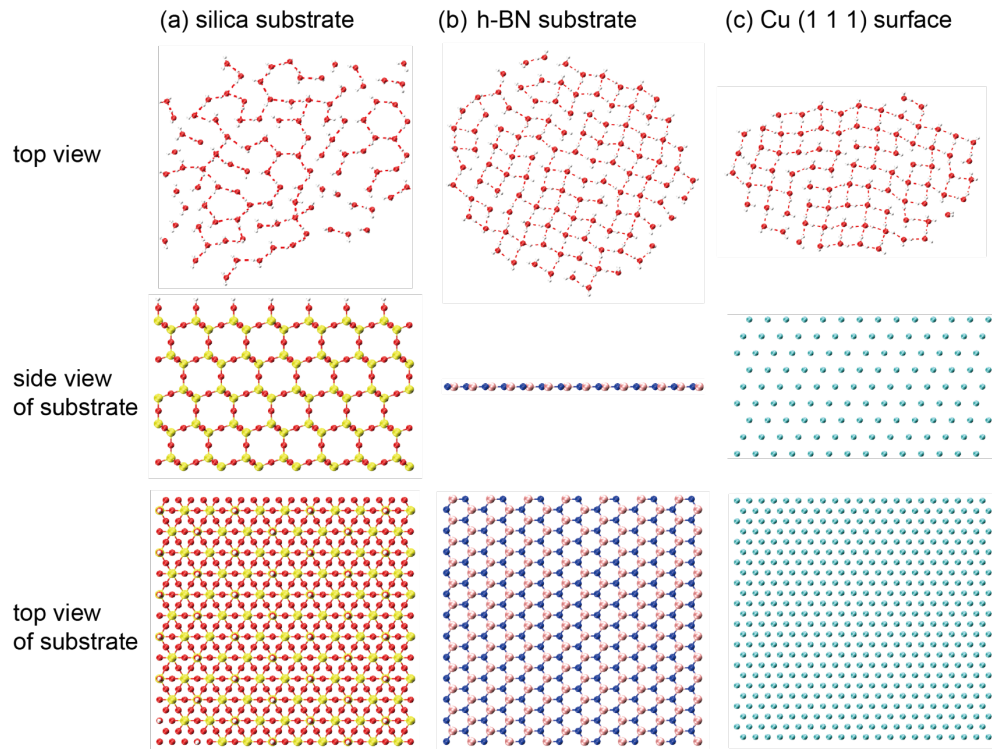

**FIG. S6.** Snapshots of monolayer EWs confined between graphene and (a) silica and (b) h-BN (c) copper substrate ( $N_W = 115$ ,  $T = 300$  K) in the 3D cover model. The forcefield parameters, including atomic charges and interatomic interaction parameters, are taken from Refs.<sup>1-4</sup>

**Table S1.** Lennard-Jones and atomic-charge parameters used for SiO<sub>2</sub>, BN, Cu substrates for the results summarized in **Fig. S6**.<sup>1-4</sup>

| Atom                                   | $\sigma$ (Kcal/mol) | $\varepsilon$ (Å) | Atomic charge ( $e$ ) |
|----------------------------------------|---------------------|-------------------|-----------------------|
| Si                                     | 0                   | 3.302             | 2.1                   |
| BO <sup>1</sup> (in SiO <sub>2</sub> ) | 0.15533             | 3.166             | -1.05                 |
| SO <sup>2</sup> (in SiO <sub>2</sub> ) | 0.15533             | 3.166             | -0.95                 |
| H (in SiO <sub>2</sub> )               | 0                   | 0                 | 0.425                 |
| B                                      | 0.09486             | 3.453             | 0.93                  |
| N                                      | 0.14477             | 3.365             | -0.93                 |
| Cu                                     | 3.85                | 2.314             | 0                     |

<sup>1</sup>BO: bridge oxygen atoms in SiO<sub>2</sub>, <sup>2</sup>SO: oxygen atoms in the surface hydroxyl of silica.  
Lorentz-Berthelot mixing rules are used for atomic pairs between different species.



## References

- 1 Dutta, R. C., Khan, S. & Singh, J. K. Wetting transition of water on graphite and boron-nitride surfaces: A molecular dynamics study. *Fluid Phase Equilib.* 302, 310-315 (2011).
- 2 Ho, T. A. et al. Interfacial water on crystalline silica: a comparative molecular dynamics simulation study. *Mol.Simul.* 37, 172-195 (2011).
- 3 Li, H. & Zeng, X. C. Wetting and interfacial properties of water nanodroplets in contact with graphene and monolayer boron-nitride sheets. *ACS Nano* 6, 2401-2409 (2012).
- 4 Wang, Y. & Xu, Z. Water Intercalation for Seamless, Electrically Insulating, and Thermally Transparent Interfaces. *ACS Appl. Mater. Interfaces* 8, 1970-1976 (2016).
